# Supplementary material for: Protective effect of Tremella fuciformis Berk extract on LPS-induced acute inflammation via inhibition of the NF-κB and MAPK pathways
Source: Royal Society of Chemistry journal article supplement (doi:10.1039/c6fo00540c), 2016-01-01
Supplement: c6fo00540c2.pdf [file c6fo00540c2.pdf]

**Fig. S1** Effects of TFE on cell viability of RAW 264.7 cells. Cells were treated with the indicated concentrations of TFE for 24 hr. TFE does not show cytotoxicity of RAW 264.7 cells.
