# Supplementary figures and images for: Protective effect of Tremella fuciformis Berk extract on LPS-induced acute inflammation via inhibition of the NF-κB and MAPK pathways
Source: Royal Society of Chemistry journal article supplement (doi:10.1039/c6fo00540c), 2016-01-01

**Figure S1**

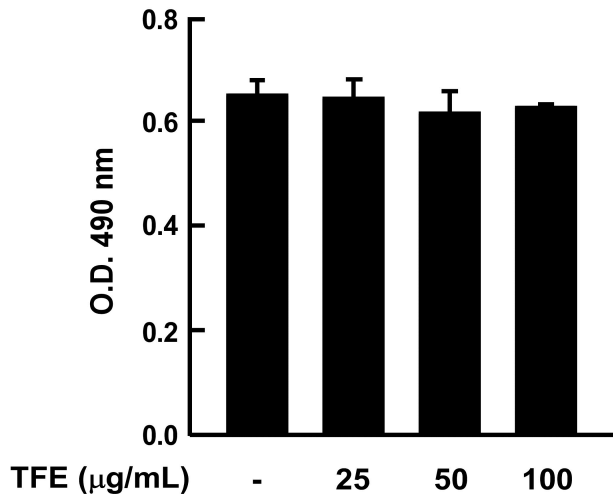

Supplement: c6fo00540c3.pdf [file c6fo00540c3.pdf]
